# Supplementary material for: Type III CRISPR–Cas provides resistance against nucleus-forming jumbo phages via abortive infection
Source: bioRxiv or medRxiv preprint supplement (doi:10.1101/2022.06.20.496707), 2022-06-20
Supplement: Supplementary file [file media-1.pdf]

## SUPPLEMENTARY MATERIAL

A

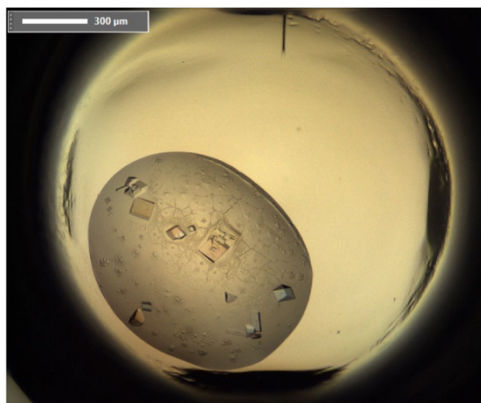

B

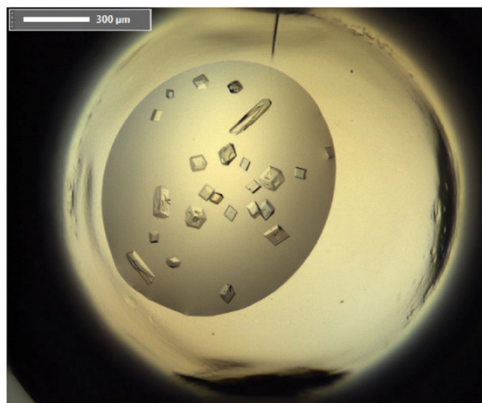

**Supplementary Figure S1. NucC crystallization.** (A) Crystallization of *Serratia* NucC apo form at 1.83 Å; NucC = 56 mg/mL, 0.1 M Na acetate pH 5.5, 10% PEG 8K, 10% PEG 1K, 0.8 M Na formate. (B) Co-crystallization of *Serratia* NucC bound to cA<sub>3</sub> at 1.48 Å; NucC = 24.5 mg/mL (+1.2x cA<sub>3</sub>/trimer), 0.1 M Tris pH 7.5, 0.2 Ca acetate, 25% PEG MME 2K. Crystallographic information is reported in **Supplementary Table S1**.

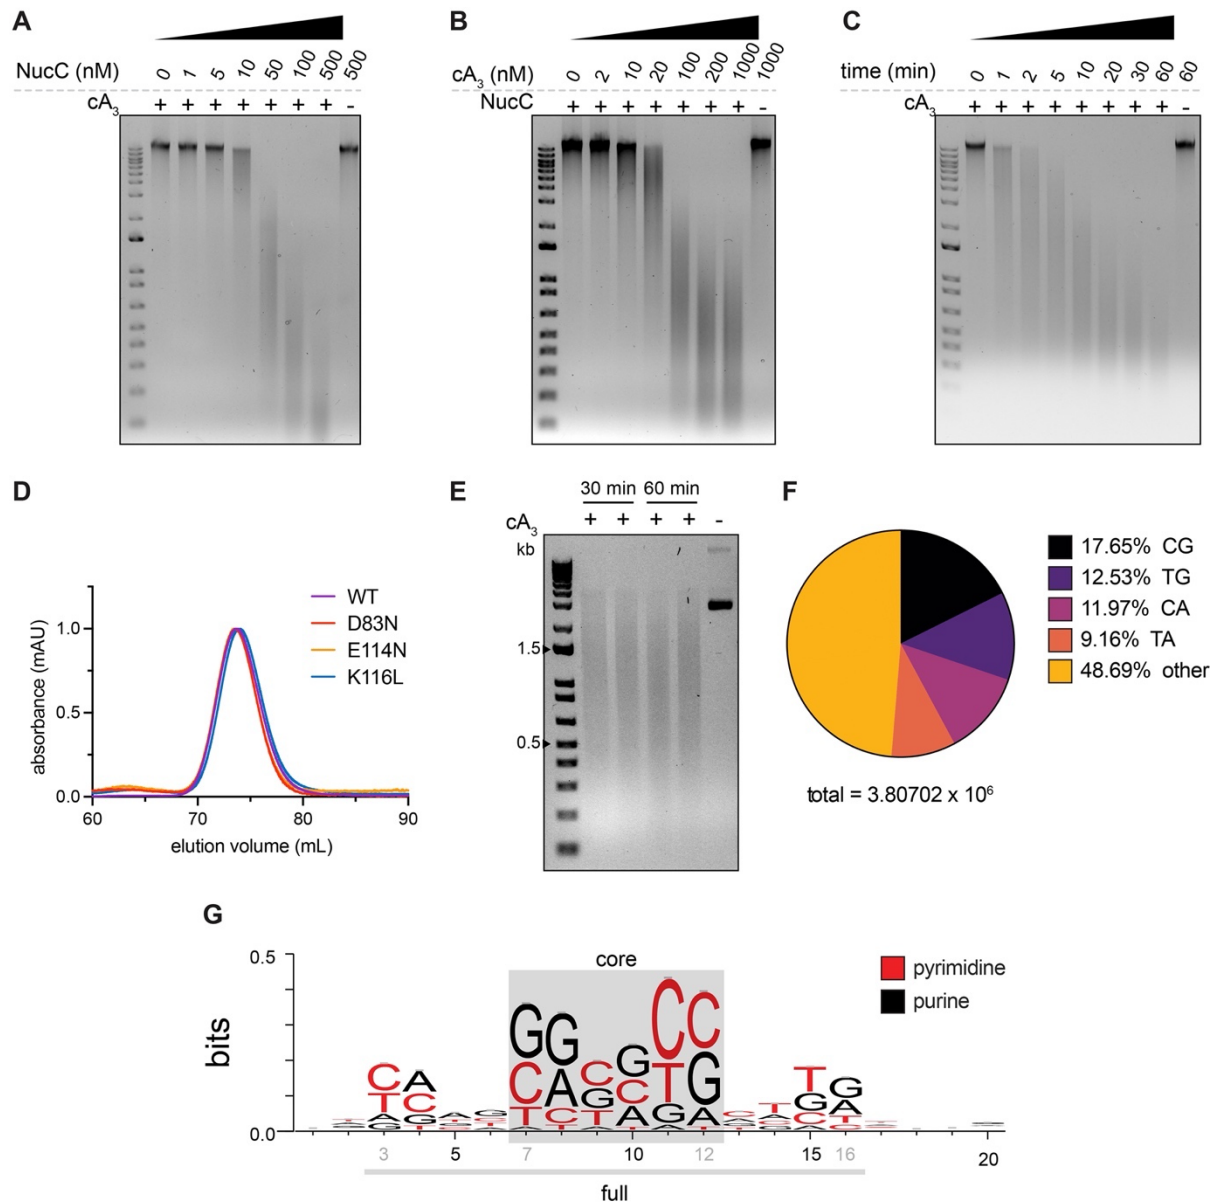

**Supplementary Figure S2. *Serratia* NucC is activated by  $cA_3$  and degrades double-stranded DNA *in vitro*.** (A) *Serratia* gDNA cleavage assay with increasing concentrations of wild-type NucC in the presence (+, 1000 nM) or absence (-) of  $cA_3$ . (B) *Serratia* gDNA cleavage assay with increasing concentrations of the activator  $cA_3$  in the presence (+, 100 nM) or absence (-) of wild-type NucC. (C) *Serratia* gDNA cleavage assay with wild-type NucC in the presence of  $cA_3$  and increasing incubation times. (D) Size exclusion chromatogram of wild-type NucC (purple, pPF2513) and nuclease active site NucC mutants D83N (red, pPF2669), E114N (orange, pPF2671) and K116L (blue, pPF2673). (E) NucC cleavage of plasmid for deep sequencing of degradation products. Plasmid pPF1043 was incubated with NucC in the presence of  $cA_3$  for 30 min or 60 min. (F) Nucleotide preferences at outermost motif positions (3 and 16). Four pyrimidine:purine combinations (C:G, T:G, C:A, T:A) at positions 3 and 16 of the predicted *in vitro* motif account for 51.31% of all sequences. (G) Cleavage site preference of NucC, represented as a WebLogo coloured according to pyrimidine (red) or purine (black) nitrogenous base nature. Mapping, per-base coverage and WebLogo summaries are reported in **Supplementary Tables S2, S3 and S4**, respectively.

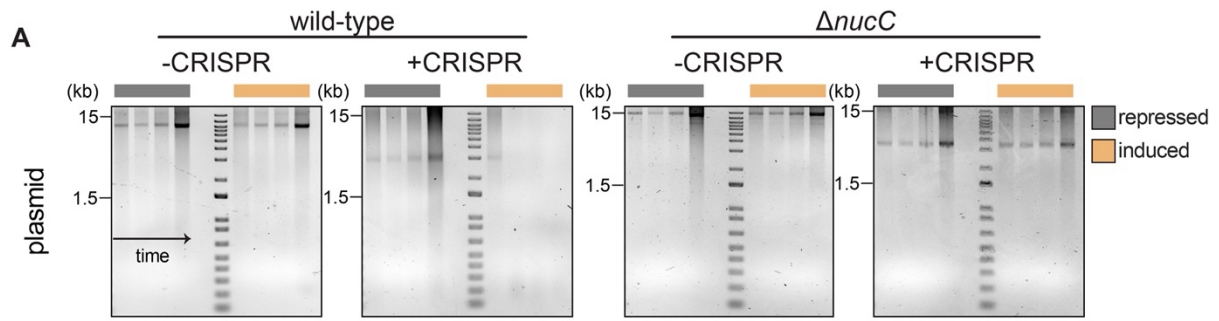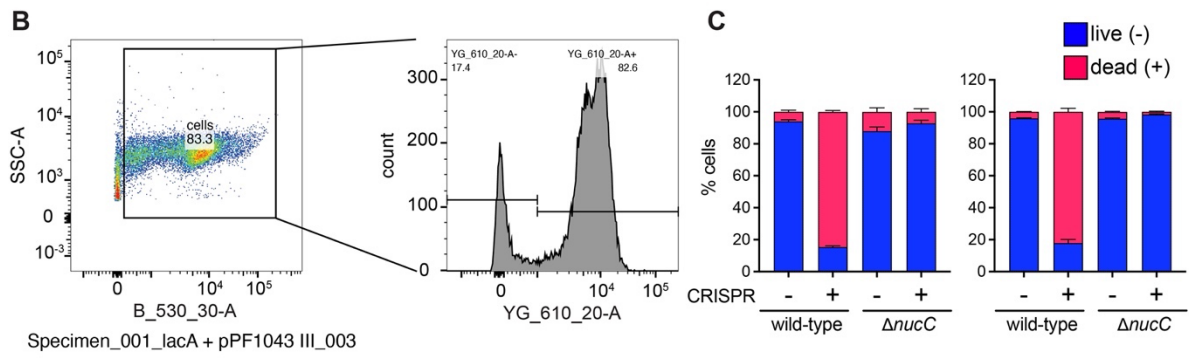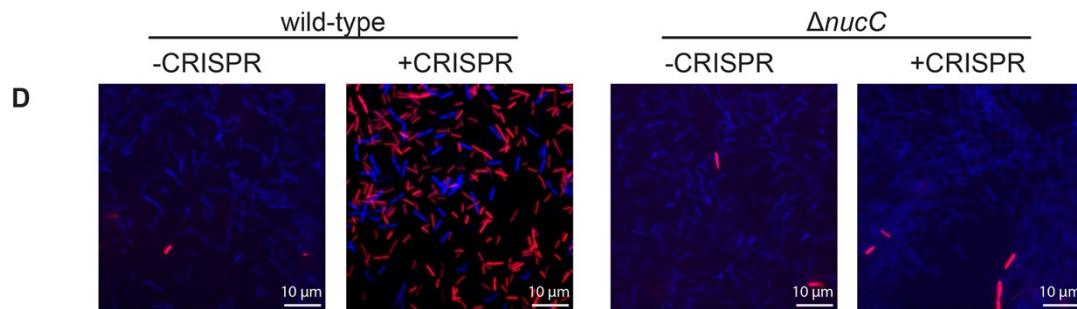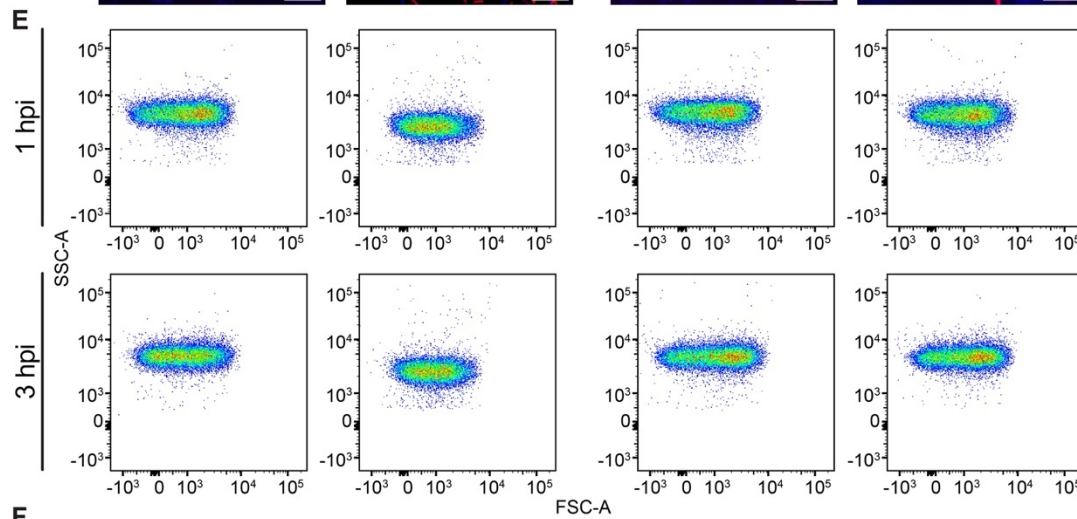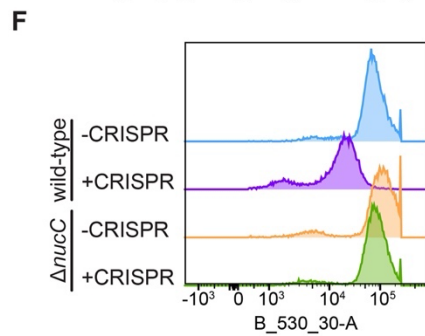

**Supplementary Figure S3. Type III immunity triggers cell death by destruction of the bacterial genome via NucC.** (A) Plasmid DNA was purified from plasmid targeting cultures at 0 h, 0.5 h, 1 h and 3 h post-induction/repression and analysed via gel electrophoresis. (B) Flow cytometry gating strategy adopted for cell viability assay during plasmid targeting assay. (C) Percentage of live (blue, negative stain) and dead cells (red, positive stain) observed for cell viability assay during plasmid targeting at 1 h and 3 h post-induction (hpi). Cell counts for cell viability assay at 1 hpi and 3 hpi are reported in **Supplementary Table S5**. (D) Cell membrane integrity was analysed via confocal microscopy at 3 hpi by staining with propidium iodide which discriminates living cells (blue, negative stain) from dead cells (red, positive stain). (E) Forward versus side scatter (FSC vs SSC) of representative samples from cell viability assay during plasmid targeting at 1 hpi and 3 hpi. FSC is indicative of cell size, and SSC relates to the complexity or granularity of the cell. (F) SYTO9 fluorescence distributions of representative samples from cell viability assay during plasmid targeting at 1 hpi. The left-skewed distributions of wild-type +CRISPR sample is consistent with DNA degradation.

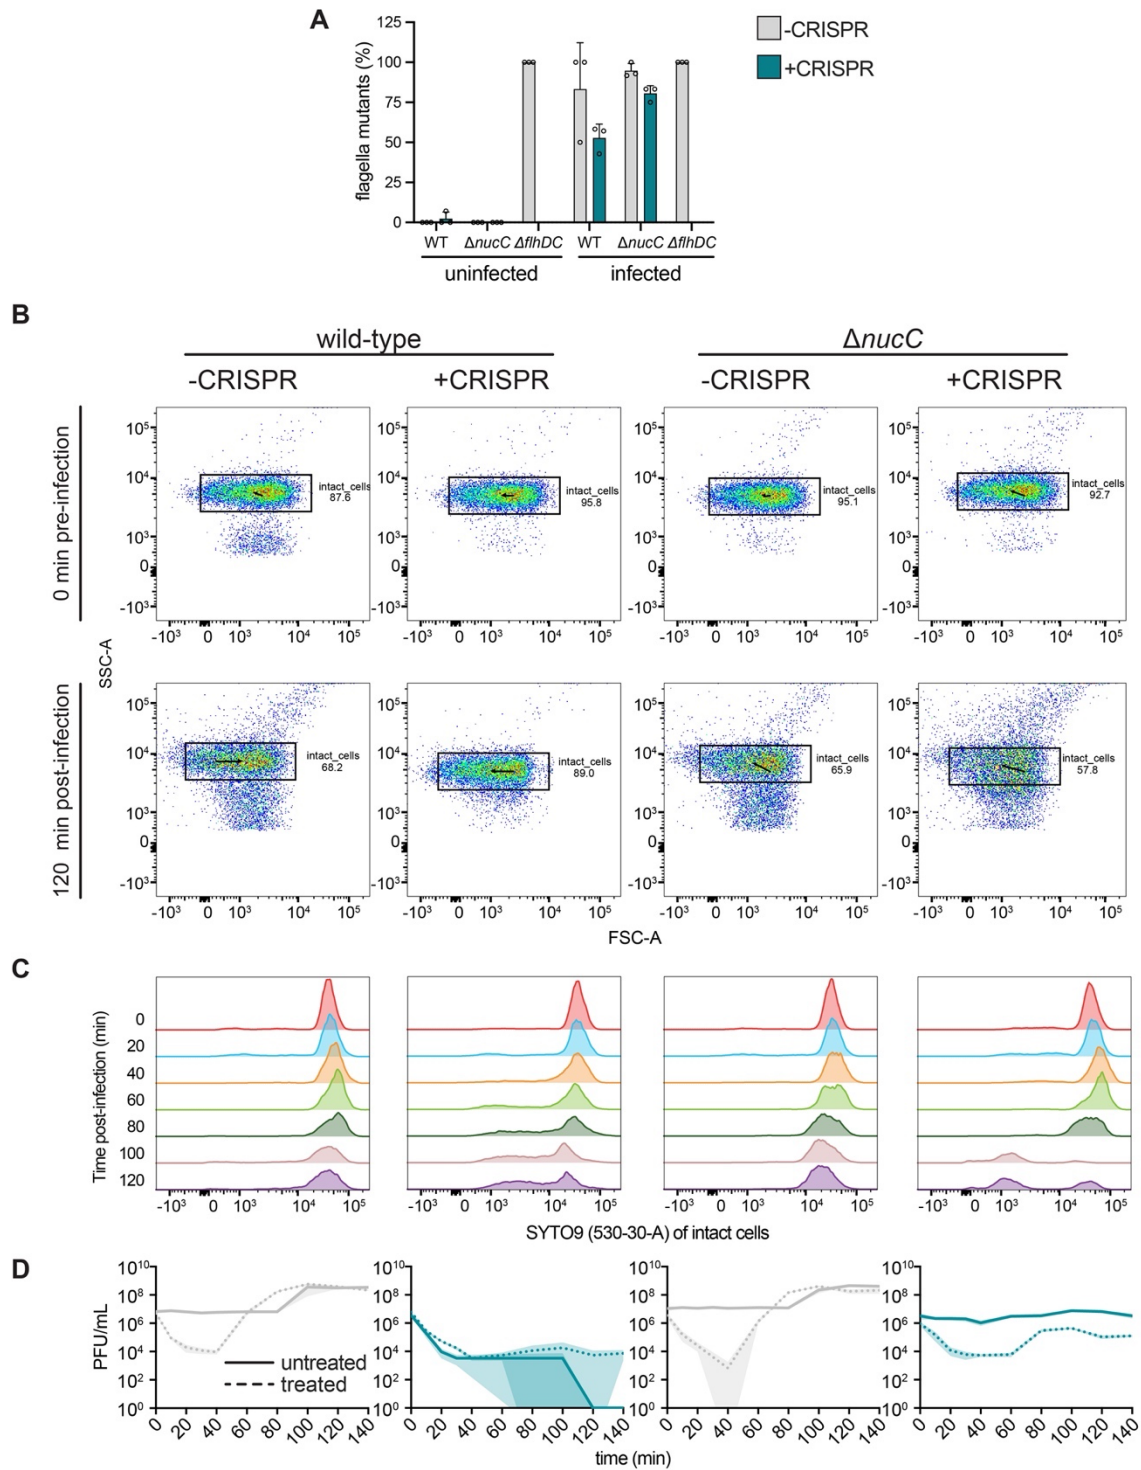

**Supplementary Figure S4. Type III immunity against the jumbo phage results in cell death of the infected individual and prevents jumbo phage reproduction. (A)** Percentage of flagella mutants identified after the cell survival assay. A swimming assay was performed from colonies from cell survival assay. **(B)** Scattering profiles of wild-type and *nucC* mutants before and 120 min post-infection. One representative plot of  $n=3$  shown. **(C)** SYTO9 fluorescence distributions of representative samples from (B) and **Figure 4E**. The left-skewed distributions of wild-type anti-phage samples are consistent with DNA degradation. Data for (B) and (C) shown in **Supplementary Table S6**. **(D)** One-step growth curves performed during jumbo-phage infections and targeting.

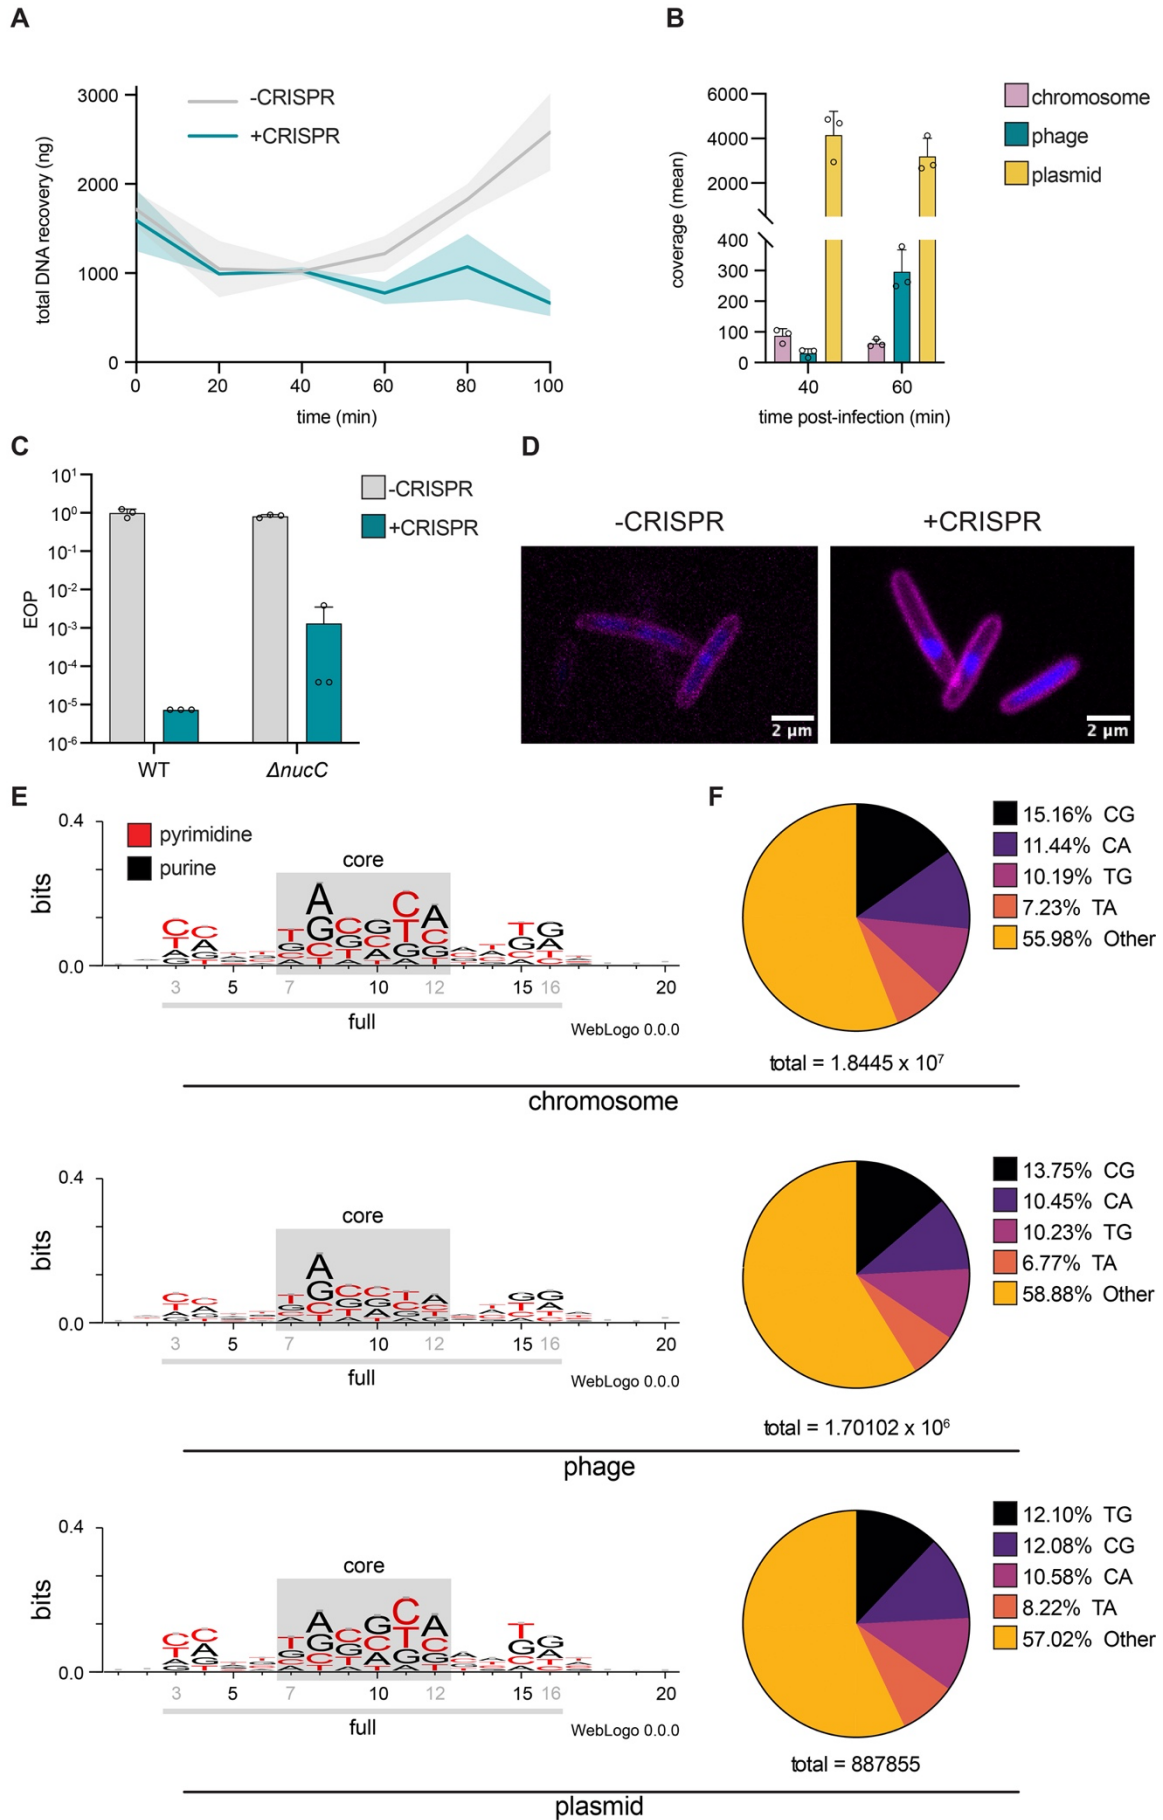

**Supplementary Figure S5. The jumbo phage DNA-containing protein shell excludes NucC.** (A) Quantification of total DNA extracted throughout a single round of jumbo phage infection from **Figure 5A**. (B) Average coverage (per-base) of *Serratia* (chromosome), PCH45 jumbo phage genome (phage) and pPF1467 (plasmid) at 40 and 60 min post-infection. Coverage was calculated using the mosdepth command line tool. The data shown represents biological triplicates plotted as the mean  $\pm$  standard deviation. (C) EOP assay with wild-type (WT) and  $\Delta nucC$  cells expressing mEGFP-NucC with a plasmid with no spacer (-CRISPR) or a spacer targeting PCH45 capsid mRNA (+CRISPR). The data shown represents biological triplicates plotted as the mean  $\pm$  standard deviation. (D) Confocal microscopy of -CRISPR and +CRISPR *Serratia* upon jumbo phage (PCH45) infection. Membranes (magenta) and DNA (blue) were stained with FM4-64 and DAPI, respectively. (E) NucC cleaves at partial palindromes in plasmid, phage and chromosomal sequences. Weblogos from deep sequencing of DNA fragments from *in vivo* cleavage by NucC, coloured according to pyrimidine (red) or purine (black) nitrogenous base nature. Cleavage occurs between motif nt positions 10 and 11. (F) Nucleotide preferences at outermost motif positions (3 and 16). Four pyrimidine:purine combinations (C:G, T:G, C:A, T:A) at positions 3 and 16 of the predicted *in vivo* motifs account for between 42-51% of all sequences. Mapping, per-base coverage and WebLogo summaries are reported in **Supplementary Tables S2, S3 and S4**, respectively.

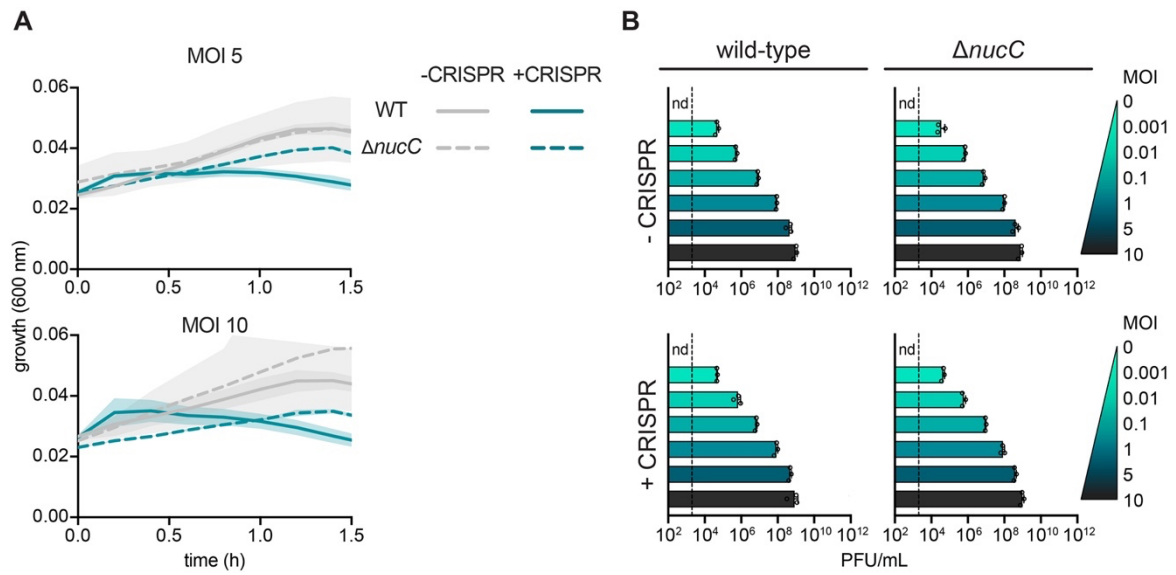

**Supplementary Figure S6. NucC provides jumbo phage immunity by protecting the population at low phage doses. (A)** Zoom in first 1.5 h of infection time courses for MOI 5 and MOI 10 from **Figure 6**. **(B)** Initial (0 hpi) phage titres of infection time courses presented in **Figure 6** were measured. Data are biological triplicates plotted as the mean  $\pm$  standard deviation. Phage infection resulting in no countable plaques were labelled non-determined (nd). Limit of detection of phage titres indicated with a dashed line.



**Supplementary Table S1.** Crystallographic information (**Figure 1**).

|                                 | <b>Apo-NucC</b>            | <b>NucC bound to cA<sub>3</sub></b> |
|---------------------------------|----------------------------|-------------------------------------|
| deposition ID                   | D_1292122076               | D_1292121303                        |
| space group                     | P21                        | H32                                 |
| wavelength                      | 1.00003                    | 1.00003                             |
| cell parameters                 | 79.468 95.492 94.536       | 114.265 114.265 96.069              |
|                                 | 90.000 92.052 90.000       | 90.0 90.0 120.0                     |
| resolution                      | 42.613-1.827 (1.858-1.827) | 43.213-1.480 (1.506-1.480)          |
| number of observations          | 848140 (41495)             | 798761 (38328)                      |
| number unique                   | 124878 (6266)              | 40117 (1987)                        |
| Rmerge                          | 0.049 (0.731)              | 0.117 (1.517)                       |
| Rpim                            | 0.020 (0.304)              | 0.027 (0.354)                       |
| mean(I)/sd(I)                   | 23.7 (2.2)                 | 17.6 (2.2)                          |
| completeness                    | 100 (99.9)                 | 100 (100)                           |
| multiplicity                    | 6.8 (6.6)                  | 19.9 (19.3)                         |
| CC(1/2)                         | 1.0 (0.832)                | 0.999 (0.773)                       |
| <b>refinement</b>               |                            |                                     |
| reflections used for refinement | 124208 (12390)             | 40111 (3970)                        |
| reflections used for R-free     | 6303 (630)                 | 1962 (192)                          |
| R-work                          | 0.1670 (0.2332)            | 0.1578 (0.2233)                     |
| R-free                          | 0.2076 (0.2848)            | 0.1811 (0.2430)                     |
| RMS(bonds)                      | 0.01                       | 0.011                               |
| RMS(angles)                     | 1.01                       | 1.13                                |
| ramachandran favored (%)        | 97.72                      | 96.72                               |
| ramachandran outliers (%)       | 0.22                       | 0                                   |
| rotamer outliers (%)            | 0.83                       | 0                                   |

Statistics for the highest-resolution shell are shown in parentheses.

**Supplementary Table S2.** Mapping summaries resulting from deep sequencing of *in vitro* (Figure 2) and *in vivo* (Figure 5) degradation products.

| sample                  | paired-end reads | total reads | reads aligned to pPF1043 | reads aligned to PCH45 | reads aligned to WT | reads aligned to pPF1467 | total reads aligned | overall alignment rate (%) | unaligned reads |
|-------------------------|------------------|-------------|--------------------------|------------------------|---------------------|--------------------------|---------------------|----------------------------|-----------------|
| In_vitro (PE mapping)*  | 3884552          | 7769104     | 7292544                  | NA                     | NA                  | NA                       | 7292544             | 93.87                      | 476560          |
| In_vitro (SE mapping)** | NA               | 3884552     | 3808751                  | NA                     | NA                  | NA                       | 3808751             | 98.05                      | 75801           |
| WT_40_min I             | 4660657          | 9321314     | NA                       | 137370                 | 8667662             | 398276                   | 9203308             | 98.73                      | 118006          |
| WT_40_min II            | 4174729          | 8349458     | NA                       | 131134                 | 7740966             | 380078                   | 8252178             | 98.83                      | 97280           |
| WT_40_min III           | 2668582          | 5337164     | NA                       | 54100                  | 4973460             | 237412                   | 5264972             | 98.65                      | 72192           |
| WT_60_min I             | 2847136          | 5694272     | NA                       | 912266                 | 4469758             | 221772                   | 5603796             | 98.41                      | 90476           |
| WT_60_min II            | 4041545          | 8083090     | NA                       | 1308200                | 6304376             | 340350                   | 7952926             | 98.39                      | 130164          |
| WT_60_min III           | 2958763          | 5917526     | NA                       | 859610                 | 4734120             | 231548                   | 5825278             | 98.44                      | 92248           |

\* this is paired end mapping of full length reads (R1 and R2), used to estimate sequencing depth (coverage) of plasmid

\*\* this is mapping of only R1 (truncated to 15 nt), used for the motif search

**Supplementary Table S3.** Per-base coverage summaries resulting from deep sequencing of *in vitro* (Figure 2) and *in vivo* (Figure 5) degradation products.

| sample                | pPF1043       |              |              | PCH45         |              |              | WT            |              |              | pPF1467       |              |              |
|-----------------------|---------------|--------------|--------------|---------------|--------------|--------------|---------------|--------------|--------------|---------------|--------------|--------------|
|                       | mean coverage | min coverage | max coverage | mean coverage | min coverage | max coverage | mean coverage | min coverage | max coverage | mean coverage | min coverage | max coverage |
| In_vitro (PE mapping) | 122297.1      | 0            | 343905       | NA            | NA           | NA           | NA            | NA           | NA           | NA            | NA           | NA           |
| WT_40_min I           | NA            | NA           | NA           | 39.55         | 0            | 88           | 105.73        | 0            | 680          | 4853.76       | 0            | 9864         |
| WT_40_min II          | NA            | NA           | NA           | 38.33         | 0            | 78           | 95.57         | 0            | 715          | 4679.12       | 0            | 9836         |
| WT_40_min III         | NA            | NA           | NA           | 15.79         | 0            | 45           | 61.67         | 0            | 416          | 2941.05       | 0            | 6342         |
| WT_60_min I           | NA            | NA           | NA           | 262.77        | 0            | 846          | 54.59         | 0            | 1165         | 2667.01       | 0            | 9228         |
| WT_60_min II          | NA            | NA           | NA           | 378.26        | 0            | 1246         | 77.47         | 0            | 1570         | 4131.47       | 0            | 16051        |
| WT_60_min III         | NA            | NA           | NA           | 249.19        | 0            | 748          | 58.21         | 0            | 1214         | 2805.58       | 0            | 10788        |

**Supplementary Table S4.** Sequence numbers used to build Weblogo motifs from deep sequencing of *in vitro* (Figure 2) and *in vivo* (Figure 5) degradation products.

| name                                              | total R1 from BAM files | total extracted fasta from BED annotation file | total extracted fasta >20nt | extracted fasta >20nt pPF1043 | extracted fasta >20nt PCH45 | extracted fasta >20nt pPF1467 | extracted fasta >20nt WT |
|---------------------------------------------------|-------------------------|------------------------------------------------|-----------------------------|-------------------------------|-----------------------------|-------------------------------|--------------------------|
| In_vitro (R1 mapped)                              | 3808751                 | 3808742                                        | 3807021                     | 3807021                       | NA                          | NA                            | NA                       |
| WT_40_min I                                       | 4601654                 | 4601454                                        | 4598153                     | NA                            | 68671                       | 195679                        | 4333803                  |
| WT_40_min II                                      | 4126089                 | 4125898                                        | 4122903                     | NA                            | 65553                       | 186891                        | 3870459                  |
| WT_40_min III                                     | 2632486                 | 2632371                                        | 2630657                     | NA                            | 27047                       | 116906                        | 2486704                  |
| WT_60_min I                                       | 2801898                 | 2801670                                        | 2799256                     | NA                            | 456043                      | 108357                        | 2234856                  |
| WT_60_min II                                      | 3976463                 | 3976207                                        | 3972988                     | NA                            | 653994                      | 166830                        | 3152164                  |
| WT_60_min III                                     | 2912639                 | 2912428                                        | 2909945                     | NA                            | 429717                      | 113192                        | 2367036                  |
| <b>total 20nt sequences for building WebLogos</b> |                         |                                                |                             |                               |                             |                               |                          |
|                                                   |                         |                                                |                             | <b>pPF1043</b>                | <b>PCH45</b>                | <b>pPF1467</b>                | <b>WT</b>                |
| In_vitro (R1 mapped)                              |                         |                                                |                             | 3807021                       | NA                          | NA                            | NA                       |
| WT_concatenation                                  |                         |                                                |                             | NA                            | 1701025                     | 887855                        | 18445022                 |

**Supplementary Table S5.** Flow cytometry viability data during plasmid targeting at 1 hpi and 3 hpi (Figure 3).

| 1 hour post-induction      |               |                  |        |              |             |         |              |             |
|----------------------------|---------------|------------------|--------|--------------|-------------|---------|--------------|-------------|
| sample                     | cells   count | cells/PI   count | % dead | mean         | sd          | % alive | mean         | sd          |
| WT -CRISPR (#1)            | 18152         | 1177             | 6.48   | <b>5.96</b>  | <b>1.04</b> | 93.52   | <b>94.04</b> | <b>1.04</b> |
| WT -CRISPR (#2)            | 18747         | 892              | 4.76   |              |             | 95.24   |              |             |
| WT -CRISPR (#3)            | 18282         | 1214             | 6.64   |              |             | 93.36   |              |             |
| WT +CRISPR (#1)            | 15548         | 13033            | 83.82  | <b>84.65</b> | <b>0.83</b> | 16.18   | <b>15.35</b> | <b>0.83</b> |
| WT +CRISPR (#2)            | 16118         | 13641            | 84.63  |              |             | 15.37   |              |             |
| WT +CRISPR (#3)            | 16094         | 13759            | 85.49  |              |             | 14.51   |              |             |
| $\Delta nucC$ -CRISPR (#1) | 17601         | 2300             | 13.07  | <b>12.03</b> | <b>2.59</b> | 86.93   | <b>87.97</b> | <b>2.59</b> |
| $\Delta nucC$ -CRISPR (#2) | 18317         | 1665             | 9.09   |              |             | 90.91   |              |             |
| $\Delta nucC$ -CRISPR (#3) | 17384         | 2424             | 13.94  |              |             | 86.06   |              |             |
| $\Delta nucC$ +CRISPR (#1) | 18341         | 918              | 5.01   | <b>7.14</b>  | <b>1.93</b> | 94.99   | <b>92.86</b> | <b>1.93</b> |
| $\Delta nucC$ +CRISPR (#2) | 18300         | 1404             | 7.67   |              |             | 92.33   |              |             |
| $\Delta nucC$ +CRISPR (#3) | 17984         | 1574             | 8.75   |              |             | 91.25   |              |             |
| 3 hour post-induction      |               |                  |        |              |             |         |              |             |
| sample                     | cells   count | cells/PI   count | % dead | mean         | sd          | % alive | mean         | sd          |
| WT -CRISPR (#1)            | 17623         | 664              | 3.77   | <b>4.01</b>  | <b>0.22</b> | 96.23   | <b>95.99</b> | <b>0.22</b> |
| WT -CRISPR (#2)            | 18424         | 752              | 4.08   |              |             | 95.92   |              |             |
| WT -CRISPR (#3)            | 19014         | 795              | 4.18   |              |             | 95.82   |              |             |
| WT +CRISPR (#1)            | 9215          | 7329             | 79.53  | <b>82.15</b> | <b>2.27</b> | 20.47   | <b>17.85</b> | <b>2.27</b> |
| WT +CRISPR (#2)            | 15970         | 13330            | 83.47  |              |             | 16.53   |              |             |
| WT +CRISPR (#3)            | 15357         | 12815            | 83.45  |              |             | 16.55   |              |             |
| $\Delta nucC$ -CRISPR (#1) | 19611         | 753              | 3.84   | <b>4.27</b>  | <b>0.37</b> | 96.16   | <b>95.73</b> | <b>0.37</b> |
| $\Delta nucC$ -CRISPR (#2) | 18740         | 837              | 4.47   |              |             | 95.53   |              |             |
| $\Delta nucC$ -CRISPR (#3) | 19131         | 862              | 4.51   |              |             | 95.49   |              |             |
| $\Delta nucC$ +CRISPR (#1) | 19549         | 249              | 1.27   | <b>1.70</b>  | <b>0.43</b> | 98.73   | <b>98.30</b> | <b>0.43</b> |
| $\Delta nucC$ +CRISPR (#2) | 19172         | 409              | 2.13   |              |             | 97.87   |              |             |
| $\Delta nucC$ +CRISPR (#3) | 19293         | 325              | 1.68   |              |             | 98.32   |              |             |

**Supplementary Table S6.** Flow cytometry data during phage infection (**Figure 4**)

| strain          | time post-infection (min) | intact_cells   Count | intact_cells   Median (B_530_30-A) | intact_cells   Freq. of Total (10,000) | debris   Count | debris   Freq. of Total (10,000) |
|-----------------|---------------------------|----------------------|------------------------------------|----------------------------------------|----------------|----------------------------------|
| WT -CRISPR (#1) | 0                         | 9085                 | 38444                              | 90.8                                   | 915            | 9.2                              |
| WT -CRISPR (#2) | 0                         | 8115                 | 38352                              | 81.2                                   | 1885           | 18.8                             |
| WT -CRISPR (#3) | 0                         | 8761                 | 37984                              | 87.6                                   | 1239           | 12.4                             |
| WT -CRISPR (#1) | 20                        | 9285                 | 40736                              | 92.8                                   | 715            | 7.2                              |
| WT -CRISPR (#2) | 20                        | 9236                 | 40054                              | 92.4                                   | 764            | 7.6                              |
| WT -CRISPR (#3) | 20                        | 9271                 | 40638                              | 92.7                                   | 729            | 7.3                              |
| WT -CRISPR (#1) | 40                        | 8837                 | 50164                              | 88.4                                   | 1163           | 11.6                             |
| WT -CRISPR (#2) | 40                        | 8734                 | 56643                              | 87.3                                   | 1266           | 12.7                             |
| WT -CRISPR (#3) | 40                        | 8938                 | 49921                              | 89.4                                   | 1062           | 10.6                             |
| WT -CRISPR (#1) | 60                        | 8329                 | 56643                              | 83.3                                   | 1671           | 16.7                             |
| WT -CRISPR (#2) | 60                        | 7933                 | 60050                              | 79.3                                   | 2067           | 20.7                             |
| WT -CRISPR (#3) | 60                        | 7731                 | 63510                              | 77.3                                   | 2269           | 22.7                             |
| WT -CRISPR (#1) | 80                        | 6439                 | 51272                              | 64.4                                   | 3561           | 35.6                             |
| WT -CRISPR (#2) | 80                        | 6855                 | 52278                              | 68.5                                   | 3145           | 31.5                             |
| WT -CRISPR (#3) | 80                        | 6862                 | 44226                              | 68.6                                   | 3138           | 31.4                             |
| WT -CRISPR (#1) | 100                       | 6083                 | 32486                              | 60.8                                   | 3917           | 39.2                             |
| WT -CRISPR (#2) | 100                       | 3067                 | 27085                              | 30.7                                   | 6933           | 69.3                             |
| WT -CRISPR (#3) | 100                       | 5805                 | 30232                              | 58.1                                   | 4195           | 41.9                             |
| WT -CRISPR (#1) | 120                       | 6710                 | 33516                              | 67.1                                   | 3290           | 32.9                             |
| WT -CRISPR (#2) | 120                       | 7084                 | 29517                              | 70.8                                   | 2916           | 29.2                             |
| WT -CRISPR (#3) | 120                       | 6846                 | 30016                              | 68.5                                   | 3154           | 31.5                             |
| WT +CRISPR (#1) | 0                         | 9293                 | 34914                              | 92.9                                   | 707            | 7.1                              |
| WT +CRISPR (#2) | 0                         | 9176                 | 38259                              | 91.8                                   | 824            | 8.2                              |
| WT +CRISPR (#3) | 0                         | 9577                 | 33597                              | 95.8                                   | 423            | 4.2                              |
| WT +CRISPR (#1) | 20                        | 9314                 | 33759                              | 93.1                                   | 686            | 6.9                              |
| WT +CRISPR (#2) | 20                        | 9265                 | 39193                              | 92.7                                   | 735            | 7.3                              |
| WT +CRISPR (#3) | 20                        | 9443                 | 33840                              | 94.4                                   | 557            | 5.6                              |
| WT +CRISPR (#1) | 40                        | 9213                 | 31263                              | 92.1                                   | 787            | 7.9                              |
| WT +CRISPR (#2) | 40                        | 9108                 | 29873                              | 91.1                                   | 892            | 8.9                              |
| WT +CRISPR (#3) | 40                        | 9262                 | 32253                              | 92.6                                   | 738            | 7.4                              |
| WT +CRISPR (#1) | 60                        | 8968                 | 25038                              | 89.7                                   | 1032           | 10.3                             |
| WT +CRISPR (#2) | 60                        | 9054                 | 25458                              | 90.5                                   | 946            | 9.5                              |
| WT +CRISPR (#3) | 60                        | 9089                 | 22079                              | 90.9                                   | 911            | 9.1                              |
| WT +CRISPR (#1) | 80                        | 8831                 | 20472                              | 88.3                                   | 1169           | 11.7                             |
| WT +CRISPR (#2) | 80                        | 8885                 | 19438                              | 88.8                                   | 1115           | 11.2                             |
| WT +CRISPR (#3) | 80                        | 8956                 | 20472                              | 89.6                                   | 1044           | 10.4                             |
| WT +CRISPR (#1) | 100                       | 9083                 | 10650                              | 90.8                                   | 917            | 9.2                              |
| WT +CRISPR (#2) | 100                       | 8913                 | 6502                               | 89.1                                   | 1087           | 10.9                             |
| WT +CRISPR (#3) | 100                       | 9019                 | 9884                               | 90.2                                   | 981            | 9.8                              |
| WT +CRISPR (#1) | 120                       | 8695                 | 8281                               | 87                                     | 1305           | 13.0                             |
| WT +CRISPR (#2) | 120                       | 8486                 | 6253                               | 84.9                                   | 1514           | 15.1                             |

|                           |     |      |       |      |      |      |
|---------------------------|-----|------|-------|------|------|------|
| WT +CRISPR (#3)           | 120 | 8898 | 10554 | 89   | 1102 | 11.0 |
| <i>ΔnucC</i> -CRISPR (#1) | 0   | 9588 | 30670 | 95.9 | 412  | 4.1  |
| <i>ΔnucC</i> -CRISPR (#2) | 0   | 9535 | 34580 | 95.3 | 465  | 4.7  |
| <i>ΔnucC</i> -CRISPR (#3) | 0   | 9512 | 33037 | 95.1 | 488  | 4.9  |
| <i>ΔnucC</i> -CRISPR (#1) | 20  | 9250 | 31869 | 92.5 | 750  | 7.5  |
| <i>ΔnucC</i> -CRISPR (#2) | 20  | 9315 | 37258 | 93.2 | 685  | 6.8  |
| <i>ΔnucC</i> -CRISPR (#3) | 20  | 9265 | 36372 | 92.7 | 735  | 7.3  |
| <i>ΔnucC</i> -CRISPR (#1) | 40  | 8811 | 36812 | 88.1 | 1189 | 11.9 |
| <i>ΔnucC</i> -CRISPR (#2) | 40  | 8662 | 46420 | 86.6 | 1338 | 13.4 |
| <i>ΔnucC</i> -CRISPR (#3) | 40  | 8771 | 45972 | 87.7 | 1229 | 12.3 |
| <i>ΔnucC</i> -CRISPR (#1) | 60  | 8352 | 34085 | 83.5 | 1648 | 16.5 |
| <i>ΔnucC</i> -CRISPR (#2) | 60  | 8025 | 46985 | 80.2 | 1975 | 19.8 |
| <i>ΔnucC</i> -CRISPR (#3) | 60  | 8633 | 41531 | 86.3 | 1367 | 13.7 |
| <i>ΔnucC</i> -CRISPR (#1) | 80  | 8011 | 24450 | 80.1 | 1989 | 19.9 |
| <i>ΔnucC</i> -CRISPR (#2) | 80  | 7360 | 33921 | 73.6 | 2640 | 26.4 |
| <i>ΔnucC</i> -CRISPR (#3) | 80  | 8106 | 29944 | 81.1 | 1894 | 18.9 |
| <i>ΔnucC</i> -CRISPR (#1) | 100 | 8160 | 20617 | 81.6 | 1840 | 18.4 |
| <i>ΔnucC</i> -CRISPR (#2) | 100 | 6837 | 26764 | 68.4 | 3163 | 31.6 |
| <i>ΔnucC</i> -CRISPR (#3) | 100 | 7770 | 24218 | 77.7 | 2230 | 22.3 |
| <i>ΔnucC</i> -CRISPR (#1) | 120 | 8368 | 19995 | 82.7 | 1632 | 17.3 |
| <i>ΔnucC</i> -CRISPR (#2) | 120 | 7315 | 25458 | 73.2 | 2685 | 26.8 |
| <i>ΔnucC</i> -CRISPR (#3) | 120 | 6588 | 25702 | 65.9 | 3412 | 34.1 |
| <i>ΔnucC</i> +CRISPR (#1) | 0   | 9343 | 38352 | 93.4 | 657  | 6.6  |
| <i>ΔnucC</i> +CRISPR (#2) | 0   | 9460 | 34085 | 94.6 | 540  | 5.4  |
| <i>ΔnucC</i> +CRISPR (#3) | 0   | 9265 | 38352 | 92.7 | 735  | 7.3  |
| <i>ΔnucC</i> +CRISPR (#1) | 20  | 9178 | 41732 | 91.8 | 822  | 8.2  |
| <i>ΔnucC</i> +CRISPR (#2) | 20  | 9176 | 38630 | 91.8 | 824  | 8.2  |
| <i>ΔnucC</i> +CRISPR (#3) | 20  | 9185 | 41132 | 91.8 | 815  | 8.2  |
| <i>ΔnucC</i> +CRISPR (#1) | 40  | 8665 | 58463 | 86.7 | 1335 | 13.3 |
| <i>ΔnucC</i> +CRISPR (#2) | 40  | 8795 | 52405 | 87.9 | 1205 | 12.1 |
| <i>ΔnucC</i> +CRISPR (#3) | 40  | 8611 | 61982 | 86.1 | 1389 | 13.9 |
| <i>ΔnucC</i> +CRISPR (#1) | 60  | 8002 | 61530 | 80   | 1998 | 20.0 |
| <i>ΔnucC</i> +CRISPR (#2) | 60  | 8497 | 50900 | 85   | 1503 | 15.0 |
| <i>ΔnucC</i> +CRISPR (#3) | 60  | 8027 | 59179 | 80.3 | 1973 | 19.7 |
| <i>ΔnucC</i> +CRISPR (#1) | 80  | 7387 | 34331 | 73.9 | 2613 | 26.1 |
| <i>ΔnucC</i> +CRISPR (#2) | 80  | 5624 | 43694 | 56.2 | 4376 | 43.8 |
| <i>ΔnucC</i> +CRISPR (#3) | 80  | 5547 | 44119 | 55.5 | 4453 | 44.5 |
| <i>ΔnucC</i> +CRISPR (#1) | 100 | 3664 | 1407  | 36.6 | 6336 | 63.4 |
| <i>ΔnucC</i> +CRISPR (#2) | 100 | 5809 | 21820 | 58.1 | 4191 | 41.9 |
| <i>ΔnucC</i> +CRISPR (#3) | 100 | 4910 | 1034  | 49.1 | 5090 | 50.9 |
| <i>ΔnucC</i> +CRISPR (#1) | 120 | 5637 | 1804  | 56.4 | 4363 | 43.6 |
| <i>ΔnucC</i> +CRISPR (#2) | 120 | 6276 | 21975 | 62.8 | 3724 | 37.2 |
| <i>ΔnucC</i> +CRISPR (#3) | 120 | 5781 | 16847 | 57.8 | 4219 | 42.2 |

**Supplementary Table S7. Strains used in this study.**

| name                                 | genotype/phenotype                                                                                                                                                                                                                                                                                                                                                         | reference                                        |
|--------------------------------------|----------------------------------------------------------------------------------------------------------------------------------------------------------------------------------------------------------------------------------------------------------------------------------------------------------------------------------------------------------------------------|--------------------------------------------------|
| <b><i>Serratia</i> sp ATCC 39006</b> |                                                                                                                                                                                                                                                                                                                                                                            |                                                  |
| LacA                                 | Lac- EMS mutant ("wild-type" parental strain for this study)                                                                                                                                                                                                                                                                                                               | (Thomson et al., 2000)                           |
| PCF686                               | LacA-derivative, $\Delta$ <i>nucC</i>                                                                                                                                                                                                                                                                                                                                      | (Malone et al., 2020)                            |
| PCF879                               | LacA-derivative, $\Delta$ <i>flhDC</i> ::Cm                                                                                                                                                                                                                                                                                                                                | (Hampton et al., 2016)                           |
| <b><i>Escherichia coli</i></b>       |                                                                                                                                                                                                                                                                                                                                                                            |                                                  |
| DH5 $\alpha$                         | cloning strain. F <sup>-</sup> , $\phi$ 80 $\Delta$ <i>lacZM15</i> , $\Delta$ ( <i>lacZYA-argF</i> )U169, <i>endA1</i> , <i>recA1</i> , <i>hsdR17</i> ( <i>rK<sup>-</sup> mK<sup>+</sup></i> ), <i>deoR</i> , <i>thi-1</i> , <i>supE44</i> , $\lambda$ <sup>-</sup> , <i>gyrA96</i> , <i>relA1</i>                                                                         | (Taylor et al., 1993)                            |
| ST18                                 | auxotrophic donor for biparental conjugation. S17-1 $\lambda$ <i>pir</i> $\Delta$ <i>hemA</i>                                                                                                                                                                                                                                                                              | (Jackson et al., 2020; Thoma and Schobert, 2009) |
| BL21(DE3)                            | protein expression strain. Str., B, F <sup>-</sup> , <i>ompT</i> , <i>gal</i> , <i>dcm</i> , <i>lon</i> , <i>hsdS<sub>B</sub></i> ( <i>r<sub>B</sub><sup>-</sup> m<sub>B</sub><sup>-</sup></i> ), $\lambda$ (DE3, [ <i>lacI</i> , <i>lacUV5-T7p07</i> , <i>ind1</i> , <i>sam7</i> , <i>nin5</i> ]), [ <i>malB<sup>+</sup></i> ] <sub>K-12</sub> ( $\lambda$ <sup>S</sup> ) | (Studier and Moffatt, 1986)                      |
| <b>Bacteriophages</b>                |                                                                                                                                                                                                                                                                                                                                                                            |                                                  |
| PCH45                                | lytic jumbo phage, family <i>Myoviridae</i> ; infects <i>Serratia</i> sp. ATCC 39006                                                                                                                                                                                                                                                                                       | (Malone et al., 2020)                            |
| JS26                                 | lytic non-jumbo phage, family <i>Siphoviridae</i> ; infects <i>Serratia</i> sp. ATCC 39006                                                                                                                                                                                                                                                                                 | (Malone et al., 2022)                            |



**Supplementary Table S8. Oligonucleotides used in this study.**

| name           | sequence (5'-3')                                                                                                                                                                                                                                                                                                                                                                                                                                                                                                                                                                                                                                                                                                                                                                                                                                                                               | description                                                                                                             |
|----------------|------------------------------------------------------------------------------------------------------------------------------------------------------------------------------------------------------------------------------------------------------------------------------------------------------------------------------------------------------------------------------------------------------------------------------------------------------------------------------------------------------------------------------------------------------------------------------------------------------------------------------------------------------------------------------------------------------------------------------------------------------------------------------------------------------------------------------------------------------------------------------------------------|-------------------------------------------------------------------------------------------------------------------------|
| <b>cloning</b> |                                                                                                                                                                                                                                                                                                                                                                                                                                                                                                                                                                                                                                                                                                                                                                                                                                                                                                |                                                                                                                         |
| pPF2513-F      | TACTTCCAATCCAATGCAATGACTAATCAGGCAAAAAA                                                                                                                                                                                                                                                                                                                                                                                                                                                                                                                                                                                                                                                                                                                                                                                                                                                         | F primer for cloning <i>Serratia nucC</i> into expression vector, generating pPF2513                                    |
| pPF2513-R      | TTATCCACTTCCAATGTTATTATCCAGACTATCTATAT                                                                                                                                                                                                                                                                                                                                                                                                                                                                                                                                                                                                                                                                                                                                                                                                                                                         | R primer for cloning <i>Serratia nucC</i> into expression vector, generating pPF2513                                    |
| PF2767         | AGACTCAGGTCGCTTTTGTGCGCTTTGTAGAAAGCAGCG                                                                                                                                                                                                                                                                                                                                                                                                                                                                                                                                                                                                                                                                                                                                                                                                                                                        | F primer complement of PF2768 to generate spacer targeting phage JS26 in pPF1477                                        |
| PF2768         | AGGACGCTGCTTTTCTACAAAGCGCACAAAGACGACCTGA                                                                                                                                                                                                                                                                                                                                                                                                                                                                                                                                                                                                                                                                                                                                                                                                                                                       | R primer complement of PF2767 to generate spacer targeting phage JS26 in pPF1477                                        |
| PF3896         | CAAAGAGGAGAAATTAAGTATGACTAATCAGGCAAAAAAGTTATCTA<br>G                                                                                                                                                                                                                                                                                                                                                                                                                                                                                                                                                                                                                                                                                                                                                                                                                                           | F1 primer for Gibson assembly of <i>Serratia nucC</i> into pQE-80L-stuffer, generating pPF2007                          |
| PF3897         | TCATACTAGGATCCGCATGCAAAGAGGAGAAATTAAGTATGACTAAT<br>CAGG                                                                                                                                                                                                                                                                                                                                                                                                                                                                                                                                                                                                                                                                                                                                                                                                                                        | F2 primer for Gibson assembly of <i>Serratia nucC</i> into pQE-80L-stuffer, generating pPF2007                          |
| PF3898         | TGGCTGCAGGTCGACCCGGGTTATTCCAGACTATCTATATACACCC<br>GC                                                                                                                                                                                                                                                                                                                                                                                                                                                                                                                                                                                                                                                                                                                                                                                                                                           | R primer for Gibson assembly of <i>Serratia nucC</i> into pQE-80L-stuffer, generating pPF2007                           |
| PF4688         | GCGAATTCGAGCTCGGTACCAAAGAGGAGAAATTAAGTATGGTGAG                                                                                                                                                                                                                                                                                                                                                                                                                                                                                                                                                                                                                                                                                                                                                                                                                                                 | F primer for amplification of gBlock PF3809, overlap with pBAD30 for Gibson assembly (KpnI);<br>pPF2290 cloning         |
| PF4689         | CTTTTTTGCCTGATTAGTCATGGATCCGCCTCCACCG                                                                                                                                                                                                                                                                                                                                                                                                                                                                                                                                                                                                                                                                                                                                                                                                                                                          | R primer for amplification of gBlock PF3809, overlap with PF4690; pPF2290 cloning                                       |
| PF4690         | AGGGCGGTGGAGGCGGATCCATGACTAATCAGGCAAAAAAGTTATC                                                                                                                                                                                                                                                                                                                                                                                                                                                                                                                                                                                                                                                                                                                                                                                                                                                 | F primer for amplification of <i>Serratia nucC</i> + linker (Glyx5-Ser), overlap with PF4689; pPF2290<br>cloning        |
| PF4691         | CAAAGGTCATCCACTGCAGTTATTCCAGACTATCTATATACACCC                                                                                                                                                                                                                                                                                                                                                                                                                                                                                                                                                                                                                                                                                                                                                                                                                                                  | R primer for amplification of <i>Serratia nucC</i> , overlap with pBAD30 for Gibson assembly (PstI);<br>pPF2290 cloning |
| PF3809         | TCGTCTTACCTCGAGAAATCAAAGAGGAGAAATTAAGTATGGTGAG<br>CAAGGGCGAGGAGCTGTTACCGGGGTGGTGCCCATCCTGGTCGA<br>GCTGGACGGCGACGTAACGGCCACAAGTTCAGCGTGTCCGGCGA<br>GGGCGAGGGCGATGCCACCTACGGCAAGCTGACCCTGAAGTTCAT<br>CTGCACCACCGGCAAGCTGCCCGTGCCCTGGCCACCCCTCGTGAC<br>CACCCCTGACCTACGGCGTGCAAGTCTTCAAGCCGCTACCCCGACCA<br>CATGAAGCAGCAGCACTTCTTCAAGTCCGCCATGCCGAAGGCTAC<br>GTCCAGGAGCGCACCATCTTCTTCAAGGACGACGGCAACTACAAGA<br>CCCGCGCCGAGGTGAAGTTCGAGGGCGACCCCTGGTGAACCGCA<br>TCGAGCTGAAGGGCATCGACTTCAAGGAGGACGGCAACATCCTGG<br>GGCACAAGCTGGAGTACAACACTACAACAGCCACAACGTCTATATCAT<br>GGCCGACAAGCAGAAGAACGGCATCAAGGTGAAGTTCAGATCCGC<br>CACAACATCGAGGACGGCAGCGTGCAGCTCGCCGACCACTACCGAG<br>CAGAACACCCCATCGGCGACGGCCCGTGTGCTGCCCCGACAAC<br>CACTACCTGAGCACCCAGTCCAAGCTGAGCAAAGACCCCAACGAGA<br>AGCGCGATCACATGGTCTGCTGGAGTTCGTGACCGCCCGCCGGGA<br>TCACTCTCGGCATGGACGAGCTGTACAAGGGCGGTGGAGGCGGAT<br>CCCTGTTGATAGATCCAGTAATGAC | gBlock template for amplification of RBS-mEGFP(no STOP codon)-linker(Gly5x-Ser);<br>pPF2290 cloning                     |
| PF5145         | TATAGAATCAAAGAGGAGAAATTAAGTATGACTAATCAGGCAAAAA<br>AGT                                                                                                                                                                                                                                                                                                                                                                                                                                                                                                                                                                                                                                                                                                                                                                                                                                          | F primer for cloning <i>Serratia nucC</i> + artificial RBS into pPF1618, generating pPF2503 (EcoRI)                     |
| PF5146         | TATAAGCTTTTATTCCAGACTATCTATATACACCCGCC                                                                                                                                                                                                                                                                                                                                                                                                                                                                                                                                                                                                                                                                                                                                                                                                                                                         | R primer for cloning <i>Serratia nucC</i> + artificial RBS into pPF1618, generating pPF2503 (HindIII)                   |

| name                                      | sequence (5'-3')                                                                                                                                                                                                            | description                                                                                                                                                          |
|-------------------------------------------|-----------------------------------------------------------------------------------------------------------------------------------------------------------------------------------------------------------------------------|----------------------------------------------------------------------------------------------------------------------------------------------------------------------|
| PF5149                                    | TATAGAATTCAAAGAGGAGAAATTA                                                                                                                                                                                                   | F primer for cloning <i>Thermus thermophilus csm6</i> + artificial RBS into pPF1618, generating pPF2505 (EcoRI)                                                      |
| PF5150                                    | TATAAAGCTTTTAGAACCCCAAGGGTACGGGT                                                                                                                                                                                            | R primer for cloning <i>Thermus thermophilus csm6</i> + artificial RBS into pPF1618, generating pPF2505 (HindIII)                                                    |
| PF5539                                    | CCAGATAAATGCAGTGATTTTTG                                                                                                                                                                                                     | F primer for site-directed mutagenesis of <i>Serratia nucC</i> active site (D83N) in pPF2513, generating pPF2669                                                     |
| PF5540                                    | TGCATTTATCTGGTCGCTG                                                                                                                                                                                                         | R primer for site-directed mutagenesis of <i>Serratia nucC</i> active site (D83N) in pPF2513, generating pPF2669                                                     |
| PF5541                                    | GTAAGTGAATGTTAAACCAACCAT                                                                                                                                                                                                    | F primer for site-directed mutagenesis of <i>Serratia nucC</i> active site (E114N) in pPF2513, generating pPF2671                                                    |
| PF5542                                    | TTAACATTCAGTACCGCGTAC                                                                                                                                                                                                       | R primer for site-directed mutagenesis of <i>Serratia nucC</i> active site (E114N) in pPF2513, generating pPF2671                                                    |
| PF5543                                    | GGTCTTCCAACCATAATAAAACC                                                                                                                                                                                                     | F primer for site-directed mutagenesis of <i>Serratia nucC</i> active site (K116L) in pPF2513, generating pPF2673                                                    |
| PF5544                                    | GTTGAAGAACCTCCAGTA                                                                                                                                                                                                          | R primer for site-directed mutagenesis of <i>Serratia nucC</i> active site (K116L) in pPF2513, generating pPF2673                                                    |
| <b>NucC cleavage assays (Figure 2G-H)</b> |                                                                                                                                                                                                                             |                                                                                                                                                                      |
| PF73                                      | GACTCTAGACACGTGGAGAAACCAAAGCC                                                                                                                                                                                               | F primer for amplification of a <i>Serratia</i> chromosomal region, generating a 1419 bp product for cleavage assays. Binds XRE family transcriptional regulator CDS |
| PF807                                     | GATCCCGGGTCAGTTCCTTGCCGTAGC                                                                                                                                                                                                 | R primer for amplification of a <i>Serratia</i> chromosomal region, generating a 1419 bp product for cleavage assays. Binds DUF165 domain-containing protein CDS     |
| PF6283                                    | CCCTACGCTCCCTCCAGCGCTGTCGGGGATATAGTCACTCGGAGTT<br>AGAGAGTTTTAGGATTGATTACTGAACTCTAGTATGGTAAACTGTGA<br>AAACTCATAAAGCTGACGAAGTAAAAGAATCAAACATAAATAACTCAAT<br>CCAGTCTAAAGAGTAGAAAAGTTGGTAAAAGATTGTGAGTCAGTCACT<br>TAATGGTCTTAGA | no motif negative control gBlock                                                                                                                                     |
| PF6284                                    | CCCTACGCTCCCTCCAGCGCTGTCGGGGATATAGTCACTCGGCAAG<br>GGCGCCCTTGAGGATTGATTACTGAACTCTAGTATGGTAAACTGTGA<br>AAACTCATAAAGCTGACGAAGTAAAAGAATCAAACATAAATAACTCAAT<br>CCAGTCTAAAGAGTAGAAAAGTTGGTAAAAGATTGTGAGTCAGTCACT<br>TAATGGTCTTAGA | full motif gBlock                                                                                                                                                    |
| PF6285                                    | CCCTACGCTCCCTCCAGCGCTGTCGGGGATATAGTCACTCGGAGTT<br>GGCGCCTTTTAGGATTGATTACTGAACTCTAGTATGGTAAACTGTGA<br>AAACTCATAAAGCTGACGAAGTAAAAGAATCAAACATAAATAACTCAAT<br>CCAGTCTAAAGAGTAGAAAAGTTGGTAAAAGATTGTGAGTCAGTCACT<br>TAATGGTCTTAGA | core motif gBlock                                                                                                                                                    |
| <b>screening</b>                          |                                                                                                                                                                                                                             |                                                                                                                                                                      |
| PF2202                                    | TATTGCATGCGGCTGACGATCTGGCGTC                                                                                                                                                                                                | chromosomal <i>Serratia nucC</i> , F primer                                                                                                                          |
| PF2199                                    | TCTTGGATCCGCTAGCGGCCTGCCGGAAC                                                                                                                                                                                               | chromosomal <i>Serratia nucC</i> , R primer                                                                                                                          |
| PF138                                     | CACACTTTGCTATGCCATAG                                                                                                                                                                                                        | pPF781-derived plasmids, F primer                                                                                                                                    |
| PF1702                                    | CGAAGACGAAAGGGCCTCGTGATACGCAAGCTTTATGGCTTGTA<br>CCGTTTTGTG                                                                                                                                                                  | pPF781-derived plasmids, R primer                                                                                                                                    |

| <b>name</b> | <b>sequence (5'-3')</b>                 | <b>description</b>                 |
|-------------|-----------------------------------------|------------------------------------|
| PF4181      | AAAGAAATCATAAAAAATTTATTTGCTTTGTGAGCGGAT | pPF976-derived plasmids, F primer  |
| PF3737      | TTTATGCATCTTCAGTCAGGGAGCGTC             | pPF976-derived plasmids, R primer  |
| PF2231      | TTTTACTAGTAGACGTTCAACAACGTCATG          | PCH45 capsid gene, F primer        |
| PF2232      | TTTTGGTACCGAAGTTATATTCGCGCGGTG          | PCH45 capsid gene, R primer        |
| PF138       | CACACTTTGCTATGCCATAG                    | pPF1618-derived plasmids, F primer |
| PF210       | GTCATTA CTGGATCTATCAACAGG               | pPF1618-derived plasmids, R primer |

**Supplementary Table S9. Plasmids used in this study.**

| name                                                       | description                                                                            | features                           | construction                                                                                                                                           | reference                 |
|------------------------------------------------------------|----------------------------------------------------------------------------------------|------------------------------------|--------------------------------------------------------------------------------------------------------------------------------------------------------|---------------------------|
| <b>protein expression and purification (Figs. 1 and 2)</b> |                                                                                        |                                    |                                                                                                                                                        |                           |
| pPF2007                                                    | template for <i>nucC</i> cloning into expression vector                                | pBR322/ori, RP4/oriT, ApR, lacI/T5 | Gibson assembly using PF3896, PF3897 + PF3898 and SphI and SmaI to Gibson assemble <i>nucC</i> into pQE-80L-oriT stuffer                               | This study                |
| pPF2513                                                    | 6xHis-TEV-NucC expression vector                                                       | ColE1/ori, f1/ori, KmR, lacI/T7    | pPF2513-F + pPF2513-R paired in a PCR to amplify <i>nucC</i> from pPF2007 and clone it into an expression vector through Ligation Independent Cloning. | This study                |
| pPF2669                                                    | 6xHis-TEV-NucC D83N mutant expression vector                                           | ColE1/ori, f1/ori, KmR, lacI/T7    | PF5539 + PF5540 paired in a PCR to introduce NucC D83N mutation in pPF2513                                                                             | This study                |
| pPF2671                                                    | 6xHis-TEV-NucC E114N mutant expression vector                                          | ColE1/ori, f1/ori, KmR, lacI/T7    | PF5541 + PF5542 paired in a PCR to introduce NucC E114N mutation in pPF2513                                                                            | This study                |
| pPF2673                                                    | 6xHis-TEV-NucC K116L mutant expression vector                                          | ColE1/ori, f1/ori, KmR, lacI/T7    | PF5543 + PF5544 paired in a PCR to introduce NucC K116L mutation in pPF2513                                                                            | This study                |
| <b>plasmid targeting (Fig. 3)</b>                          |                                                                                        |                                    |                                                                                                                                                        |                           |
| pPF781                                                     | untargeted control for the type III-A system                                           | p15A/ori, RP4/oriT, CmR, pBAD/araC | pBAD30 derivative                                                                                                                                      | (Patterson et al., 2016)  |
| pPF1043                                                    | targeted type III-A with protospacer complementary to <i>Serratia</i> CRISPR3 spacer 1 | p15A/ori, RP4/oriT, CmR, pBAD/araC | pPF781 derivative                                                                                                                                      | (Patterson et al., 2016)  |
| <b>phage targeting (Figs. 4, 5, 6 and 7)</b>               |                                                                                        |                                    |                                                                                                                                                        |                           |
| pPF976                                                     | type III-A repeat-BsaI-repeat construct for artificial crRNA                           | pBR322/ori, RP4/oriT, KmR, lacI/T5 | pPF260 derivative                                                                                                                                      | (Malone et al., 2020)     |
| pPF1467                                                    | anti-PCH45 III-A spacer overexpression. III-A_PCH45_PS4 (capsid protein)               | pBR322/ori, RP4/oriT, KmR, lacI/T5 | pPF976 derivative                                                                                                                                      | (Malone et al., 2020)     |
| pPF1477                                                    | anti-JS26 III-A spacer overexpression. III-A_JS26_PS8 (capsid protein)                 | pBR322/ori, RP4/oriT, KmR, lacI/T5 | PF2767 and PF2768 were annealed, digested with BsaI and ligated into pPF976 cut with BsaI                                                              | This study                |
| <b>NucC localization microscopy (Fig. 5)</b>               |                                                                                        |                                    |                                                                                                                                                        |                           |
| pPF2290                                                    | mEGFP-NucC expression vector                                                           | p15A/ori, RP4/oriT, GmR, pBAD/araC | Gibson assembly PF4688/PF4689 (gblockPF3809) + PF4690/PF4691 (LacA)                                                                                    | This study                |
| <b>accessory nuclease swap (Fig. 7)</b>                    |                                                                                        |                                    |                                                                                                                                                        |                           |
| pPF1618                                                    | empty vector control for expression                                                    | RK2/ori, OriT, ApR, pBAD/araC      | pSEVA1810 (pBAD) and pSEVA121 (ApR, RK2) were digested with PacI and EcoRI, and ligated into one vector.                                               | This study                |
| pPF2503                                                    | <i>Serratia</i> NucC expression vector                                                 | RK2/ori, OriT, ApR, pBAD/araC      | PF5145 + PF5146 paired in a PCR to amplify <i>nucC</i> from <i>Serratia</i> LacA and cloned it into pPF1618 (EcoRI/HindIII)                            | This study                |
| pC0075                                                     | <i>Thermus thermophilus</i> Csm6 template                                              |                                    | TtCsm6 His6-TwinStrep-SUMO-BsaI (Addgene #115270)                                                                                                      | (Gootenberg et al., 2018) |
| pPF2505                                                    | <i>T. thermophilus</i> Csm6 expression vector                                          | RK2/ori, OriT, ApR, pBAD/araC      | PF5149 + PF5150 paired in a PCR to amplify <i>csm6</i> from pAddgene_115270 and clone it into pPF1618 (EcoRI/HindIII)                                  | This study                |

## REFERENCES

- Gootenberg, J.S., Abudayyeh, O.O., Kellner, M.J., Joung, J., Collins, J.J., and Zhang, F. (2018). Multiplexed and portable nucleic acid detection platform with Cas13, Cas12a, and Csm6. *Science* 360, 439-444. 10.1126/science.aaq0179.
- Hampton, H.G., McNeil, M.B., Paterson, T.J., Ney, B., Williamson, N.R., Easingwood, R.A., Bostina, M., Salmond, G.P.C., and Fineran, P.C. (2016). CRISPR-Cas gene-editing reveals RsmA and RsmC act through FlhDC to repress the SdhE flavinylation factor and control motility and prodigiosin production in *Serratia*. *Microbiology* 162, 1047-1058. 10.1099/mic.0.000283.
- Jackson, S.A., Fellows, B.J., and Fineran, P.C. (2020). Complete Genome Sequences of the *Escherichia coli* Donor Strains ST18 and MFDpir. *Microbiol Resour Announc* 9. 10.1128/MRA.01014-20.
- Malone, L.M., Hampton, H.G., Morgan, X.C., and Fineran, P.C. (2022). Type I CRISPR-Cas provides robust immunity but incomplete attenuation of phage-induced cellular stress. *Nucleic Acids Res* 50, 160-174. 10.1093/nar/gkab1210.
- Malone, L.M., Warring, S.L., Jackson, S.A., Warnecke, C., Gardner, P.P., Gumy, L.F., and Fineran, P.C. (2020). A jumbo phage that forms a nucleus-like structure evades CRISPR-Cas DNA targeting but is vulnerable to type III RNA-based immunity. *Nat Microbiol* 5, 48-55. 10.1038/s41564-019-0612-5.
- Patterson, A.G., Jackson, S.A., Taylor, C., Evans, G.B., Salmond, G.P.C., Przybilski, R., Staals, R.H.J., and Fineran, P.C. (2016). Quorum Sensing Controls Adaptive Immunity through the Regulation of Multiple CRISPR-Cas Systems. *Mol Cell* 64, 1102-1108. 10.1016/j.molcel.2016.11.012.
- Studier, F.W., and Moffatt, B.A. (1986). Use of bacteriophage T7 RNA polymerase to direct selective high-level expression of cloned genes. *J Mol Biol* 189, 113-130. 10.1016/0022-2836(86)90385-2.
- Taylor, R.G., Walker, D.C., and McInnes, R.R. (1993). *E. coli* host strains significantly affect the quality of small scale plasmid DNA preparations used for sequencing. *Nucleic Acids Res* 21, 1677-1678. 10.1093/nar/21.7.1677.
- Thoma, S., and Schobert, M. (2009). An improved *Escherichia coli* donor strain for diparental mating. *FEMS Microbiol Lett* 294, 127-132. 10.1111/j.1574-6968.2009.01556.x.
- Thomson, N.R., Crow, M.A., McGowan, S.J., Cox, A., and Salmond, G.P. (2000). Biosynthesis of carbapenem antibiotic and prodigiosin pigment in *Serratia* is under quorum sensing control. *Mol Microbiol* 36, 539-556. 10.1046/j.1365-2958.2000.01872.x.
